# Supplementary material for: Degradation of phenolic compounds in wastewater using a conical-shaped packed-bed microbial fuel cell in continuous flow with recycling
Source: Royal Society of Chemistry journal article supplement (doi:10.1039/d2ta08667k), 2023-01-01
Supplement: d2ta08667k1.pdf [file d2ta08667k1.pdf]

**Degradation of phenolic compounds in wastewater using a conical packed bed microbial fuel cell in continuous flow with recycle**

Shiv Singh<sup>a,b\*</sup>, Komal Pandey<sup>c</sup>, Nishith Verma<sup>c,d\*</sup>

<sup>a</sup>Industrial Waste Utilization, Nano and Biomaterials, Council of Scientific and Industrial Research- Advanced Materials and Processes Research Institute, Bhopal-462026, India

<sup>b</sup>Academy of Scientific and Innovative Research (AcSIR), Ghaziabad-201002, India

<sup>c</sup>Center for Environmental Science and Engineering Indian Institute of Technology Kanpur, Kanpur-208016, India

<sup>d</sup>Department of Chemical Engineering, Indian Institute of Technology Kanpur, Kanpur-208016, India

Corresponding authors: Dr. Shiv Singh: [sshiv.singh@ampri.res.in](mailto:sshiv.singh@ampri.res.in), [sshiviitk@gmail.com](mailto:sshiviitk@gmail.com); Dr.

Nishith Verma: [vermanishith@gmail.com](mailto:vermanishith@gmail.com), [nishith@iitk.ac.in](mailto:nishith@iitk.ac.in)

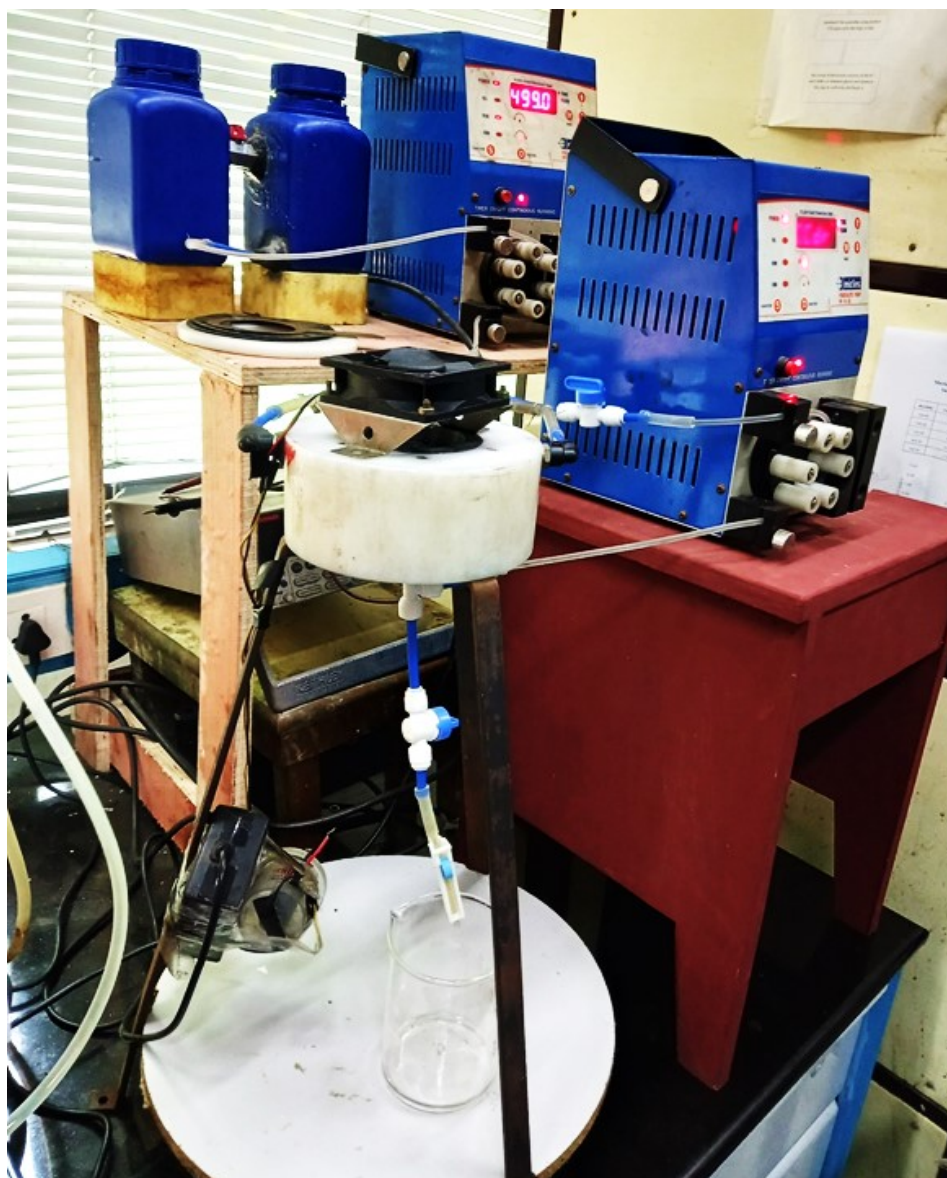

Figure S1. Digital images of Recycle-SCMFC setup in continuous mode.

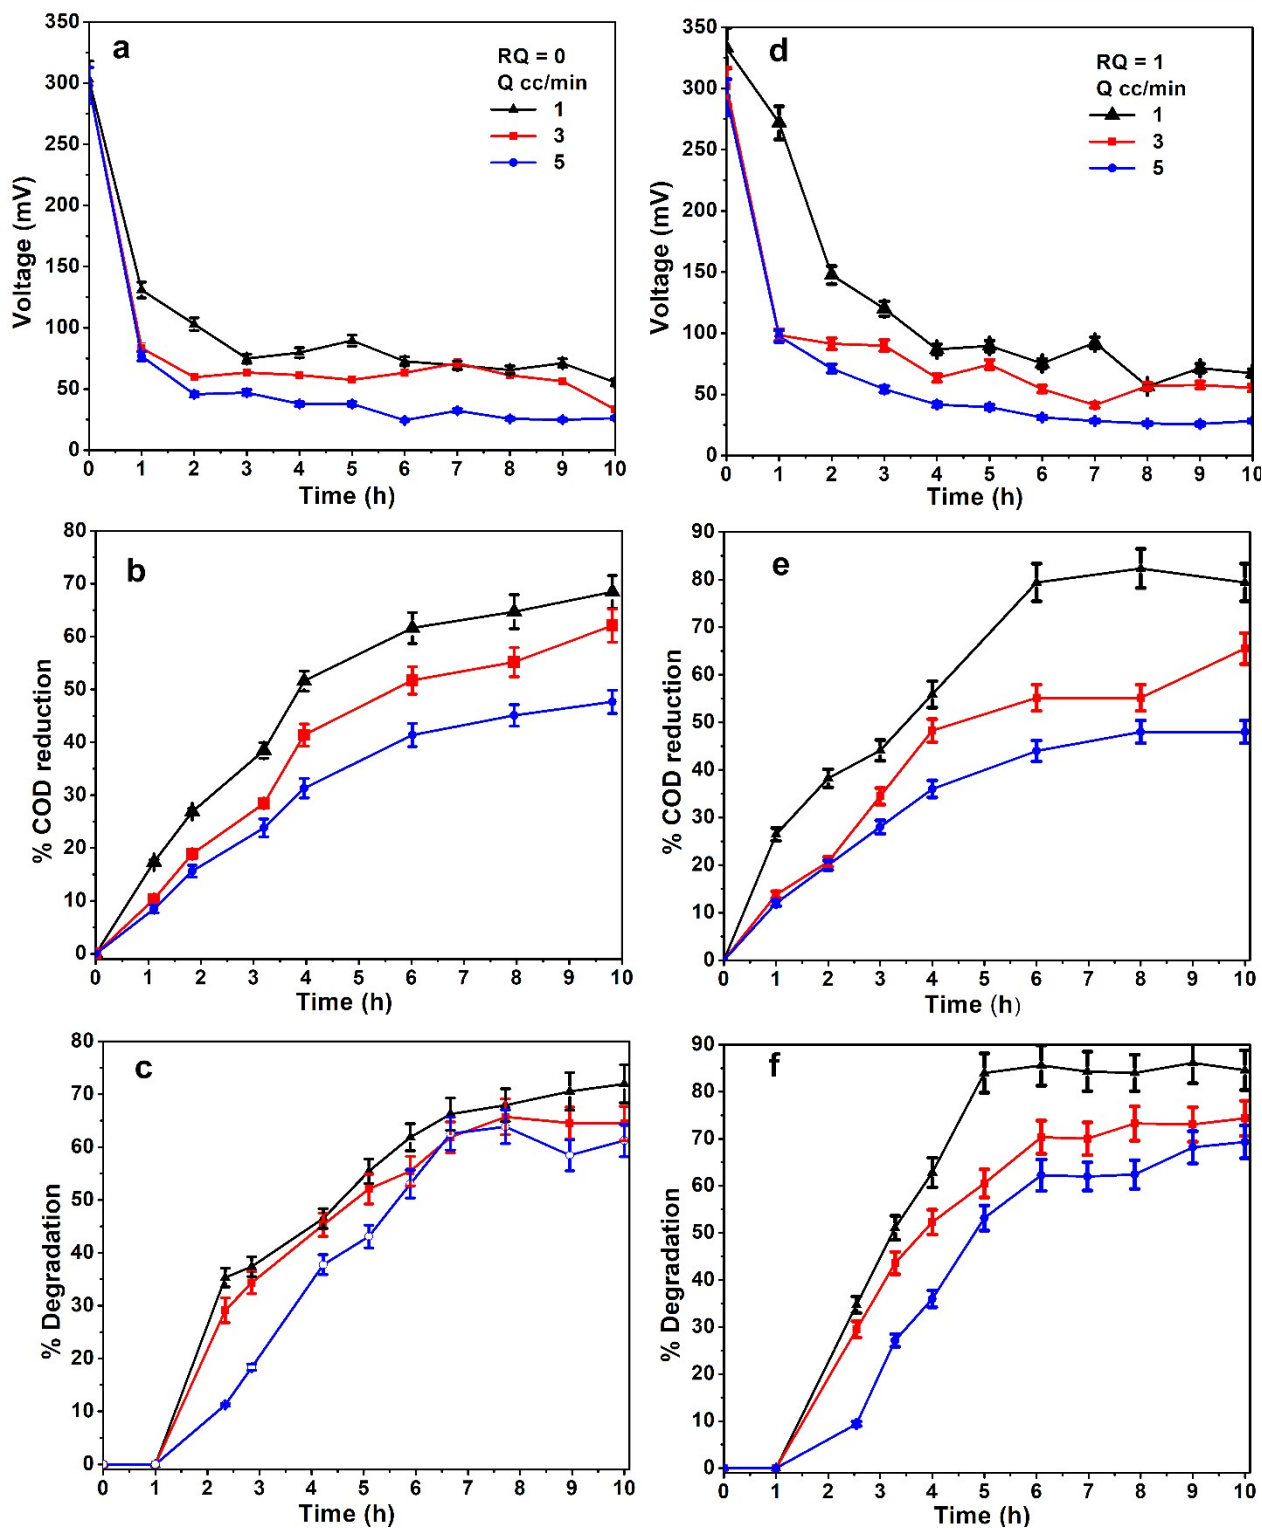

Figure S2. Effect of flowrates (RQ = 0 and Q = 1, 3 and 5 cc/min, left side) on (a) voltage generation, (b) % COD reduction of wastewater, and (c) % degradation of 1-2-PD (1000 ppm) w.r.t. time (h). Effect of flowrates (RQ = 1 and Q = 1, 3 and 5 cc/min, right side) on (d) voltage generation (e) %COD reduction and (f) % degradation of 1-2-PD (1000 ppm) w.r.t. time (h).

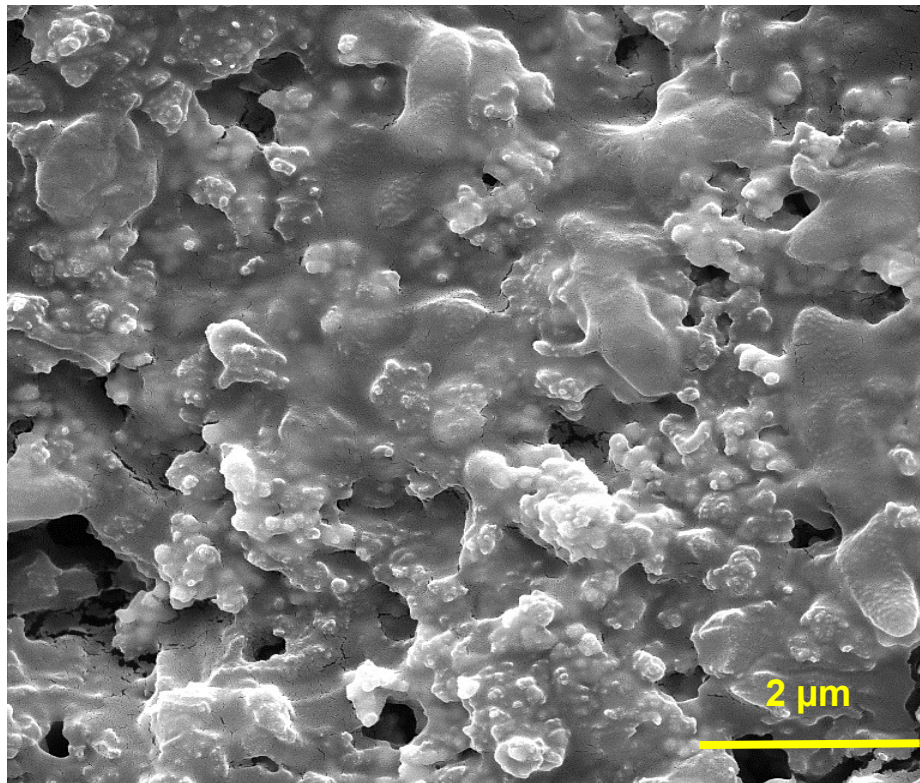

Figure S3. SEM image of a thick and dense biofilm on the anode surface.



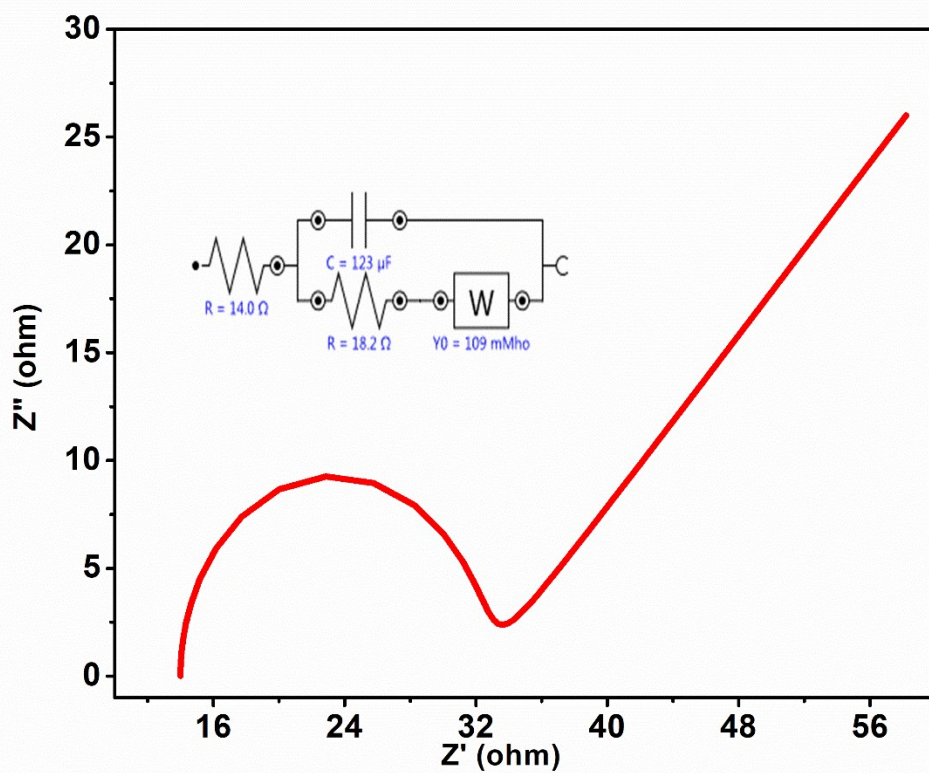

Figure S4. EIS analysis of the prepared recycle-SCMFC in continuous mode using 1000 ppm of 1-2-PD.

Table S1. Comparison of the SCMFC developed in this study with the literature for the treatment of phenolic wastewater.

| S.No. | Type of industrial effluent                                      | COD (mg/L) | Chamber volume (mL) | Anode/Cathode                                             | Flow rate (mL/min) | % COD reduction  | OCP (mV) | Power density (mW/m <sup>2</sup> ) | Current density (mA/m <sup>2</sup> ) | Ref.       |
|-------|------------------------------------------------------------------|------------|---------------------|-----------------------------------------------------------|--------------------|------------------|----------|------------------------------------|--------------------------------------|------------|
| 1     | 1,2 Propanediol/Propylene glycol                                 | 10000      | 51                  | CeO <sub>2</sub> -CNF/ACB / CeO <sub>2</sub> -CNF/ACF     | 1, 3, 5            | 84               | 380      | ~420                               | ~4500 mA/m <sup>3</sup>              | This study |
| 2     | Glycerol                                                         | 9200       | 346                 | Cu–Ru/MgO catalysts                                       | 0.03               | 97               |          |                                    |                                      | 1          |
| 3     | Ethoxylated nonylphenols (NPnEO) (synthetic nonionic surfactant) | 30, 60, 90 | 6500                | silica beads, granular activated carbon, or glass spheres | 9.0, 10.6,13.2     | 77-99            |          |                                    |                                      | 2          |
| 4     | Ethylphenol (4-EP)                                               | 40000      | 6200                | K5 biomass carriers                                       |                    |                  |          |                                    |                                      | 3          |
| 5     | Phenol                                                           | 2400       | 5000                | sugarcane bagasse (SCB)                                   | 4, 8, 12, 16, 20   | 94               |          |                                    |                                      | 4          |
| 6     | Phenol, o-cresol, and p-cresol                                   | 300        | 450                 | stainless steel mesh                                      | 300 – 500          | 93               |          |                                    |                                      | 5          |
| 7     | SCMFC                                                            | Phenol     | 1000, 2000          | 5000                                                      | tea waste          | 5.46, 8.19, 16.3 | 120      | 97                                 |                                      | 6          |

## References

1. D. K. Pandey and P. Biswas, *New Journal of Chemistry*, 2019, **43**, 10073-10086.
2. L. Bertin, D. Di Gioia, C. Barberio, L. Salvadori, L. Marchetti and F. Fava, *Industrial & engineering chemistry research*, 2007, **46**, 6681-6687.
3. C. Genethliou, M. Kornaros and S. Dailianis, *Journal of environmental management*, 2020, **255**, 109882.
4. B. Basak, B.-H. Jeon, M. B. Kurade, G. D. Saratale, B. Bhunia, P. K. Chatterjee and A. Dey, *Ecotoxicology and Environmental Safety*, 2019, **180**, 317-325.
5. Y. Zhou and M. Nemati, *Water, Air, & Soil Pollution*, 2018, **229**, 1-14.
6. A. Gupta and C. Balomajumder, *Korean Journal of Chemical Engineering*, 2016, **33**, 559-566.
